# Supplementary material for: Performance of Two Trichogrammatid Species from Zambia on Fall Armyworm, Spodoptera frugiperda (J. E. Smith) (Lepidoptera: Noctuidae)
Source: MDPI journal article supplement (doi:10.3390/insects12100859), 2021-09-23
Supplement: s1 [file s1]

**Supplementary Table S1. *COI* sequences of trichogrammatid species used in this study**

| Species                            | COI-Product | Origin                  | Accession number | Database     |
|------------------------------------|-------------|-------------------------|------------------|--------------|
| <i>Trichogramma cacoeciae</i>      | 607 bp      | Canada British Columbia | KM559290         | NCBI         |
| <i>Trichogramma cacoeciae</i>      | 518 bp      | Germany                 | MF624050         | NCBI         |
| <i>Trichogramma cacoeciae</i>      | 518 bp      | Germany                 | DQ177917         | NCBI         |
| <i>Trichogramma chilonis</i>       | 518 bp      | China Liaoning          | DQ177915         | NCBI         |
| <i>Trichogramma chilonis</i>       | 627 bp      | Pakistan: Islamabad     | KY836727         | NCBI         |
| <i>Trichogramma dendrolimi</i>     | 518 bp      | China Jilin             | MF624057         | NCBI         |
| <i>Trichogramma embryophagum</i>   | 684 bp      | Iran                    | KC488685         | NCBI         |
| <i>Trichogramma evanescens</i>     | 518 bp      | China Beijing           | MF624058         | NCBI         |
| <i>Trichogramma japonicum</i>      | 518 bp      | China Jiangsu           | MF624062         | NCBI         |
| <i>Trichogramma mwanzai</i>        | 654 bp      | India                   | KP142716         | NCBI         |
| <i>Trichogramma mwanzai</i>        | 518 bp      | Kenya                   | DQ177920         | NCBI         |
| <i>Trichogramma mwanzai</i>        | 647 bp      | South Africa Mpumalanga | KMPUJ4988-19     | BOLD Systems |
| <i>Trichogramma ostriniae</i>      | 518 bp      | China Guangzhou         | DQ177914         | NCBI         |
| <i>Trichogramma ostriniae</i>      | 518 bp      | China Hainan            | MF624063         | NCBI         |
| <i>Trichogramma platneri</i>       | 652 bp      | USA California          | KX512841         | NCBI         |
| <i>Trichogramma platneri</i>       | 570 bp      | Canada British Columbia | KR901258         | NCBI         |
| <i>Trichogramma</i> sp.            | 471 bp      | Zambia Lusaka           | MZ7711322        | NCBI         |
| <i>Trichogrammatoidea armigera</i> | 489 bp      | India                   | KM977847         | NCBI         |
| <i>Trichogrammatoidea bactrae</i>  | 642 bp      | India                   | KP142715         | NCBI         |

|                                          |        |                         |              |              |
|------------------------------------------|--------|-------------------------|--------------|--------------|
| <i>Trichogrammatoidea cryptophlebiae</i> | 617 bp | Israel                  | MH102410     | NCBI         |
| <i>Trichogrammatoidea lutea</i>          | 472 bp | Gabon Moyen-Ogooue      | GMGGJ1306-17 | BOLD Systems |
| <i>Trichogrammatoidea lutea</i>          | 640 bp | South Africa Mpumalanga | KMPAN2870-19 | BOLD Systems |
| <i>Trichogrammatoidea lutea</i>          | 641 bp | South Africa Mpumalanga | KMPDI3501-19 | BOLD Systems |
| <i>Trichogrammatoidea lutea</i>          | 640 bp | South Africa Mpumalanga | KMPHO1838-19 | BOLD Systems |
| <i>Trichogrammatoidea lutea</i>          | 646 bp | South Africa Mpumalanga | KMPHS1407-19 | BOLD Systems |
| <i>Trichogrammatoidea lutea</i>          | 649 bp | South Africa Mpumalanga | KMPHU1264-19 | BOLD Systems |
| <i>Trichogrammatoidea lutea</i>          | 648 bp | South Africa Mpumalanga | KMPIT110-19  | BOLD Systems |
| <i>Trichogrammatoidea lutea</i>          | 641 bp | South Africa Limpopo    | KMPJU341-19  | BOLD Systems |
| <i>Trichogrammatoidea lutea</i>          | 647 bp | South Africa Limpopo    | KMPJV1222-19 | BOLD Systems |
| <i>Trichogrammatoidea lutea</i>          | 648 bp | South Africa Mpumalanga | KMPUJ6424-19 | BOLD Systems |
| <i>Trichogrammatoidea lutea</i>          | 671 bp | South Africa Limpopo    | KMPWD145-18  | BOLD Systems |
| <i>Trichogrammatoidea lutea</i>          | 645 bp | South Africa Mpumalanga | KMPWR3001-19 | BOLD Systems |
| <i>Trichogrammatoidea lutea</i>          | 645 bp | South Africa Mpumalanga | KMPWS1853-19 | BOLD Systems |
| <i>Trichogrammatoidea lutea</i>          | 652 bp | South Africa Limpopo    | KMPNP1457-19 | BOLD Systems |
| <i>Trichogrammatoidea lutea</i>          | 648 bp | South Africa Limpopo    | KMPNS1419-19 | BOLD Systems |
| <i>Trichogrammatoidea lutea</i>          | 638 bp | South Africa Limpopo    | KMPOR274-19  | BOLD Systems |
| <i>Trichogrammatoidea lutea</i>          | 649 bp | South Africa Limpopo    | KMPOU265-19  | BOLD Systems |
| <i>Trichogrammatoidea lutea</i>          | 640 bp | South Africa Limpopo    | KMPPK251-19  | BOLD Systems |
| <i>Trichogrammatoidea robusta</i>        | 617 bp | India                   | KP233826     | NCBI         |
| <i>Trichogrammatoidea</i> sp.            | 471 bp | Zambia Lusaka           | MZ7711343    | NCBI         |
